# Supplementary material for: Aspergillus niger Secretes Citrate to Increase Iron Bioavailability
Source: Front Microbiol. 2017 Aug 2;8:1424. doi: 10.3389/fmicb.2017.01424 (PMC5539119; doi:10.3389/fmicb.2017.01424)
Supplement: Supplementary file 4 [file DataSheet4.XLSX]

## Sheet: NW305w0xFe10xFe_HTout
Pathway name (reference pathway)	Pathway (KEGG map)	# EC in reference pathway	# EC expressed (m)	# EC differentially expressed (x)	p-value		N	465	total # EC identified in all pathways (see tab "NW305w0xFe10xFe_all")
Energy metabolism							k	196	total # EC differentially expressed over all pathways ( see tab "NW305w0xFe10xFe_DE")
Oxidative phosphorylation	path:map00190	11	8	1	0.988004
Nitrogen metabolism	path:map00910	36	7	5	0.116813
Methane metabolism	path:map00680	87	15	6	0.664263
Sulfur metabolism	path:map00920	45	7	4	0.331423
Carbohydrate metabolism
Citrate cycle (TCA cycle)	path:map00020	25	17	10	0.121884
Glycolysis / Gluconeogenesis	path:map00010	49	21	9	0.558693
Pyruvate metabolism	path:map00620	68	21	12	0.11605
Starch and sucrose metabolism	path:map00500	76	25	17	0.00674269
Galactose metabolism	path:map00052	47	13	7	0.278134
Inositol phosphate metabolism	path:map00562	48	12	5	0.623456
Pentose phosphate pathway	path:map00030	54	15	7	0.457381
Propanoate metabolism	path:map00640	56	13	9	0.0433538
Fructose and mannose metabolism	path:map00051	74	16	6	0.735983
Glyoxylate and dicarboxylate metabolism	path:map00630	73	13	9	0.0433538
Amino sugar and nucleotide sugar metabolism	path:map00520	118	23	10	0.529353
Pentose and glucuronate interconversions	path:map00040	67	12	5	0.623456
Butanoate metabolism	path:map00650	58	9	6	0.122994
C5-Branched dibasic acid metabolism	path:map00660	22	3	3	0.0742233
Ascorbate and aldarate metabolism	path:map00053	47	4	2	0.562081
Metabolism of cofactors and vitamins
Lipoic acid metabolism	path:map00785	3	2	1	0.66587
One carbon pool by folate	path:map00670	24	13	5	0.707125
Pantothenate and CoA biosynthesis	path:map00770	31	11	6	0.293936
Biotin metabolism	path:map00780	20	7	1	0.979029
Folate biosynthesis	path:map00790	26	7	1	0.979029
Thiamine metabolism	path:map00730	21	5	0	1
Riboflavin metabolism	path:map00740	24	5	2	0.700391
Nicotinate and nicotinamide metabolism	path:map00760	56	9	2	0.946843
Vitamin B6 metabolism	path:map00750	26	4	2	0.562081
Porphyrin and chlorophyll metabolism	path:map00860	83	13	1	0.999283
Ubiquinone and other terpenoid-quinone biosynthesis	path:map00130	43	3	1	0.807316
Retinol metabolism	path:map00830	16	1	0	1
Translation
Aminoacyl-tRNA biosynthesis	path:map00970	31	20	9	0.482641
Amino acid metabolism
Valine, leucine and isoleucine biosynthesis	path:map00290	14	8	6	0.0628322
Phenylalanine, tyrosine and tryptophan biosynthesis	path:map00400	43	18	12	0.0290251
Arginine biosynthesis	path:map00220	32	13	9	0.0433538
Cysteine and methionine metabolism	path:map00270	77	27	10	0.773385
Alanine, aspartate and glutamate metabolism	path:map00250	50	16	10	0.0786769
Lysine biosynthesis	path:map00300	32	10	2	0.966644
Valine, leucine and isoleucine degradation	path:map00280	38	11	7	0.125308
Histidine metabolism	path:map00340	42	10	6	0.201957
Arginine and proline metabolism	path:map00330	85	16	8	0.345073
Lysine degradation	path:map00310	56	9	3	0.808985
Tryptophan metabolism	path:map00380	71	11	7	0.125308
Tyrosine metabolism	path:map00350	68	8	7	0.0113451
Phenylalanine metabolism	path:map00360	71	8	6	0.0628322
Lipid metabolism
Biosynthesis of unsaturated fatty acids	path:map01040	15	8	2	0.916207
Fatty acid biosynthesis	path:map00061	18	9	9	0.0003768
Synthesis and degradation of ketone bodies	path:map00072	6	3	3	0.0742233
Fatty acid elongation	path:map00062	13	5	1	0.936228
Glycine, serine and threonine metabolism	path:map00260	67	21	6	0.938039
Sphingolipid metabolism	path:map00600	31	8	2	0.916207
alpha-Linolenic acid metabolism	path:map00592	17	4	1	0.889061
Fatty acid degradation	path:map00071	30	7	3	0.627208
Steroid biosynthesis	path:map00100	23	5	3	0.354616
Glycerophospholipid metabolism	path:map00564	66	14	5	0.776911
Glycerolipid metabolism	path:map00561	38	8	2	0.916207
Linoleic acid metabolism	path:map00591	16	2	0	1
Ether lipid metabolism	path:map00565	27	2	0	1
Arachidonic acid metabolism	path:map00590	31	1	0	1
Glycan biosynthesis and metabolism
Other glycan degradation	path:map00511	9	4	0	1
N-Glycan biosynthesis	path:map00510	34	14	5	0.776911
Various types of N-glycan biosynthesis	path:map00513	25	9	5	0.311513
Glycosylphosphatidylinositol(GPI)-anchor biosynthesis	path:map00563	4	1	0	1
Glycosaminoglycan degradation	path:map00531	16	2	0	1
Other types of O-glycan biosynthesis	path:map00514	14	1	0	1
Glycosphingolipid biosynthesis - ganglio series	path:map00604	11	2	0	1
Glycosphingolipid biosynthesis - globo series	path:map00603	14	2	1	0.66587
Metabolism of other amino acids
Selenocompound metabolism	path:map00450	20	7	4	0.331423
Glutathione metabolism	path:map00480	42	14	5	0.776911
beta-Alanine metabolism	path:map00410	37	9	4	0.571708
Cyanoamino acid metabolism	path:map00460	27	6	2	0.800365
Taurine and hypotaurine metabolism	path:map00430	20	3	2	0.382977
D-Arginine and D-ornithine metabolism	path:map00472	10	1	1	0.421505
Phosphonate and phosphinate metabolism	path:map00440	22	1	0	1
Nucleotide metabolism
Pyrimidine metabolism	path:map00240	65	22	8	0.78197
Purine metabolism	path:map00230	112	36	12	0.902899
Xenobiotics biodegradation and metabolism
Drug metabolism - other enzymes	path:map00983	21	6	2	0.800365
Drug metabolism - cytochrome P450	path:map00982	10	2	2	0.177141
Metabolism of xenobiotics by cytochrome P450	path:map00980	12	2	2	0.177141
Styrene degradation	path:map00643	20	3	3	0.0742233
Ethylbenzene degradation	path:map00642	10	1	0	1
Chloroalkane and chloroalkene degradation	path:map00625	22	2	1	0.66587
Atrazine degradation	path:map00791	12	1	0	1
Aminobenzoate degradation	path:map00627	62	6	2	0.800365
Benzoate degradation	path:map00362	71	6	1	0.9634
Fluorobenzoate degradation	path:map00364	18	1	0	1
Caprolactam degradation	path:map00930	21	1	0	1
Naphthalene degradation	path:map00626	22	1	1	0.421505
Chlorocyclohexane and chlorobenzene degradation	path:map00361	30	1	0	1
Toluene degradation	path:map00623	30	1	0	1
Biosynthesis of other secondary metabolites
Streptomycin biosynthesis	path:map00521	18	5	2	0.700391
Novobiocin biosynthesis	path:map00401	12	3	2	0.382977
Monobactam biosynthesis	path:map00261	14	3	1	0.807316
Carbapenem biosynthesis	path:map00332	12	2	0	1
Tropane, piperidine and pyridine alkaloid biosynthesis	path:map00960	30	4	3	0.203873
Aflatoxin biosynthesis	path:map00254	13	1	1	0.421505
Butirosin and neomycin biosynthesis	path:map00524	26	2	0	1
Caffeine metabolism	path:map00232	14	1	0	1
Penicillin and cephalosporin biosynthesis	path:map00311	14	1	1	0.421505
Glucosinolate biosynthesis	path:map00966	15	1	1	0.421505
Phenylpropanoid biosynthesis	path:map00940	35	2	2	0.177141
Isoquinoline alkaloid biosynthesis	path:map00950	56	3	3	0.0742233
Metabolism of terpenoids and polyketides
Terpenoid backbone biosynthesis	path:map00900	50	12	7	0.195879
Geraniol degradation	path:map00281	15	2	0	1
Tetracycline biosynthesis	path:map00253	8	1	1	0.421505
Biosynthesis of ansamycins	path:map01051	8	1	1	0.421505
Zeatin biosynthesis	path:map00908	11	1	0	1
Limonene and pinene degradation	path:map00903	23	2	0	1
Sesquiterpenoid and triterpenoid biosynthesis	path:map00909	80	1	0	1

## Sheet: NW305w0xFe10xFe_all
Pathway	PathwaySize	#ECsCovered	Ratio	EC-numbers
path:map00626	22	1	0.0454545	1.1.1.1
path:map00310	56	9	0.160714	1.2.1.3;1.2.1.31;1.2.4.2;1.5.1.10;1.5.1.7;2.1.1.43;2.3.1.61;2.3.1.9;4.2.1.17
path:map00311	14	1	0.0714286	1.4.3.3
path:map00720	54	16	0.296296	1.1.1.37;1.1.1.42;1.3.5.1;1.5.1.20;1.5.1.5;2.3.1.9;2.3.3.8;3.5.4.9;4.2.1.17;4.2.1.2;4.2.1.3;6.2.1.1;6.2.1.5;6.3.4.3;6.4.1.1;6.4.1.2
path:map00195	3	1	0.333333	3.6.3.14
path:map00253	8	1	0.125	6.4.1.2
path:map00250	50	16	0.32	1.4.1.4;2.1.3.2;2.4.2.14;2.6.1.1;2.6.1.16;2.6.1.19;2.6.1.2;3.5.1.1;4.1.1.15;4.3.2.1;4.3.2.2;6.3.1.2;6.3.4.4;6.3.4.5;6.3.5.4;6.3.5.5
path:map00410	37	9	0.243243	1.2.1.18;1.2.1.3;1.4.3.21;2.5.1.16;2.6.1.19;3.1.2.4;4.1.1.15;4.2.1.17;6.3.2.1
path:map00254	13	1	0.0769231	6.4.1.2
path:map00860	83	13	0.156627	1.16.3.1;1.3.1.76;1.3.3.3;2.1.1.107;2.3.1.37;2.5.1.61;4.1.1.37;4.2.1.24;4.4.1.17;4.99.1.1;4.99.1.4;5.4.3.8;6.1.1.17
path:map00785	3	2	0.666667	2.3.1.181;2.8.1.8
path:map00190	11	8	0.727273	1.10.2.2;1.3.5.1;1.6.5.3;1.6.99.3;1.9.3.1;3.6.1.1;3.6.3.14;3.6.3.6
path:map00780	20	7	0.35	1.1.1.100;2.1.1.197;2.3.1.41;2.8.1.6;4.2.1.59;6.3.3.3;6.3.4.15
path:map00380	71	11	0.15493	1.11.1.21;1.11.1.6;1.13.11.6;1.14.13.9;1.2.1.3;1.2.4.2;1.4.3.22;2.3.1.9;3.5.1.4;3.7.1.3;4.2.1.17
path:map00061	18	9	0.5	1.1.1.100;1.3.1.9;2.3.1.39;2.3.1.41;2.3.1.86;3.1.2.14;4.2.1.59;6.2.1.3;6.4.1.2
path:map00062	13	5	0.384615	1.1.1.330;1.3.1.38;2.3.1.16;2.3.1.199;4.2.1.17
path:map00770	31	11	0.354839	1.1.1.169;1.1.1.86;2.1.2.11;2.2.1.6;2.6.1.42;2.7.1.24;2.7.1.33;2.7.8.7;4.2.1.9;6.3.2.1;6.3.2.5
path:map00513	25	9	0.36	2.4.1.131;2.4.1.132;2.4.1.141;2.4.1.142;2.4.1.257;2.4.1.258;2.4.99.18;3.2.1.113;3.2.1.52
path:map00460	27	6	0.222222	2.1.2.1;2.3.2.2;3.2.1.21;3.5.1.1;3.5.1.49;4.2.1.66
path:map00670	24	13	0.541667	1.5.1.15;1.5.1.20;1.5.1.3;1.5.1.5;2.1.1.45;2.1.2.1;2.1.2.10;2.1.2.2;2.1.2.3;3.5.1.10;3.5.4.9;6.3.3.2;6.3.4.3
path:map00680	87	15	0.172414	1.1.1.284;1.1.1.37;1.1.1.95;1.2.1.2;2.1.2.1;2.6.1.52;2.7.1.11;2.7.1.29;3.1.2.12;3.1.3.11;3.1.3.3;4.1.2.13;4.2.1.11;4.4.1.22;6.2.1.1
path:map00240	65	22	0.338462	1.17.4.1;1.3.5.2;1.8.1.9;2.1.1.45;2.1.3.2;2.4.2.1;2.4.2.10;2.4.2.9;2.7.1.48;2.7.4.6;2.7.4.9;2.7.7.6;2.7.7.7;3.5.2.3;3.5.4.1;3.5.4.12;3.5.4.5;3.6.1.19;3.6.1.23;4.1.1.23;6.3.4.2;6.3.5.5
path:map00480	42	14	0.333333	1.1.1.42;1.1.1.44;1.1.1.49;1.11.1.15;1.17.4.1;1.8.1.7;1.8.5.1;2.3.2.2;2.5.1.16;2.5.1.18;3.4.19.13;3.5.2.9;4.1.1.17;6.3.2.2
path:map00710	25	12	0.48	1.1.1.37;1.2.1.12;2.2.1.1;2.6.1.1;2.6.1.2;2.7.2.3;3.1.3.11;4.1.1.49;4.1.2.13;5.1.3.1;5.3.1.1;5.3.1.6
path:map00950	56	3	0.0535714	1.4.3.21;2.6.1.1;2.6.1.57
path:map00400	43	18	0.418605	1.1.1.24;1.1.1.25;1.3.1.13;2.4.2.18;2.5.1.19;2.5.1.54;2.6.1.1;2.6.1.57;2.6.1.9;2.7.1.71;4.1.1.48;4.1.3.27;4.2.1.10;4.2.1.20;4.2.3.4;4.2.3.5;5.3.1.24;5.4.99.5
path:map00401	12	3	0.25	2.6.1.1;2.6.1.57;2.6.1.9
path:map00500	76	25	0.328947	1.1.1.22;2.4.1.1;2.4.1.11;2.4.1.15;2.4.1.18;2.4.1.34;2.7.1.1;2.7.1.2;2.7.7.9;3.1.1.11;3.1.3.12;3.2.1.1;3.2.1.15;3.2.1.20;3.2.1.21;3.2.1.28;3.2.1.3;3.2.1.37;3.2.1.39;3.2.1.4;3.2.1.58;3.2.1.67;3.2.1.91;5.3.1.9;5.4.2.2
path:map00940	35	2	0.0571429	1.11.1.21;3.2.1.21
path:map00790	26	7	0.269231	1.5.1.3;2.5.1.15;2.7.6.3;2.8.1.12;3.5.4.16;4.1.99.18;6.3.2.17
path:map00791	12	1	0.0833333	3.5.1.5
path:map00010	49	21	0.428571	1.1.1.1;1.2.1.12;1.2.1.3;1.2.4.1;1.8.1.4;2.3.1.12;2.7.1.1;2.7.1.11;2.7.1.2;2.7.1.40;2.7.2.3;3.1.3.11;4.1.1.1;4.1.1.49;4.1.2.13;4.2.1.11;5.1.3.3;5.3.1.1;5.3.1.9;5.4.2.2;6.2.1.1
path:map00660	22	3	0.136364	1.1.1.85;2.2.1.6;6.2.1.5
path:map00230	112	36	0.321429	1.1.1.205;1.17.1.4;1.17.4.1;1.7.3.3;2.1.2.2;2.1.2.3;2.4.2.1;2.4.2.14;2.4.2.7;2.7.1.20;2.7.1.25;2.7.1.40;2.7.4.3;2.7.4.6;2.7.4.8;2.7.6.1;2.7.7.4;2.7.7.6;2.7.7.7;3.5.1.5;3.5.2.17;3.5.2.5;3.5.3.4;3.5.4.10;3.5.4.2;3.5.4.6;3.6.1.19;4.3.2.2;4.6.1.1;5.4.2.2;6.3.2.6;6.3.3.1;6.3.4.13;6.3.4.4;6.3.5.2;6.3.5.3
path:map00232	14	1	0.0714286	1.7.3.3
path:map00430	20	3	0.15	1.13.11.20;2.3.2.2;4.1.1.15
path:map01040	15	8	0.533333	1.1.1.100;1.1.1.330;1.14.19.1;1.3.1.38;1.3.3.6;2.3.1.16;2.3.1.199;4.2.1.17
path:map00920	45	7	0.155556	1.8.1.2;1.8.4.8;2.5.1.47;2.5.1.48;2.7.1.25;2.7.7.4;3.1.3.7
path:map00650	58	9	0.155172	1.1.1.83;1.3.5.1;2.2.1.6;2.3.1.9;2.3.3.10;2.6.1.19;2.8.3.5;4.1.1.15;4.2.1.17
path:map00220	32	13	0.40625	1.2.1.38;1.4.1.4;2.3.1.1;2.3.1.35;2.6.1.1;2.6.1.11;2.6.1.2;2.7.2.8;3.5.1.5;3.5.3.1;4.3.2.1;6.3.1.2;6.3.4.5
path:map00630	73	13	0.178082	1.1.1.37;1.11.1.6;1.2.1.2;2.1.2.1;2.3.1.9;2.3.3.1;2.3.3.9;3.5.1.10;3.5.1.49;4.1.3.1;4.1.3.16;4.2.1.3;6.3.1.2
path:map00340	42	10	0.238095	1.1.1.23;1.2.1.3;1.4.3.22;2.4.2.17;2.6.1.9;3.1.3.15;3.5.4.19;3.6.1.31;4.2.1.19;5.3.1.16
path:map01051	8	1	0.125	2.2.1.1
path:map00930	21	1	0.047619	4.2.1.17
path:map00030	54	15	0.277778	1.1.1.44;1.1.1.49;1.1.3.4;2.2.1.1;2.2.1.2;2.7.1.11;2.7.6.1;3.1.1.31;3.1.3.11;4.1.2.13;4.1.2.4;5.1.3.1;5.3.1.6;5.3.1.9;5.4.2.2
path:map00640	56	13	0.232143	1.2.1.18;1.2.1.27;1.8.1.4;2.3.1.9;2.3.3.5;2.6.1.19;3.1.2.4;4.2.1.17;4.2.1.79;6.2.1.1;6.2.1.4;6.2.1.5;6.4.1.2
path:map00642	10	1	0.1	2.3.1.16
path:map00643	20	3	0.15	1.13.11.5;3.5.1.4;3.7.1.2
path:map00130	43	3	0.0697674	1.13.11.27;2.1.1.163;2.1.1.201
path:map00521	18	5	0.277778	2.7.1.1;2.7.1.2;3.1.3.25;5.4.2.2;5.5.1.4
path:map00520	118	23	0.194915	1.1.1.22;1.6.2.2;2.3.1.4;2.4.1.16;2.6.1.16;2.7.1.1;2.7.1.2;2.7.1.6;2.7.7.12;2.7.7.13;2.7.7.23;2.7.7.9;3.2.1.14;3.2.1.37;3.2.1.52;3.2.1.55;3.5.1.25;3.5.99.6;5.1.3.2;5.3.1.8;5.3.1.9;5.4.2.2;5.4.2.8
path:map00524	26	2	0.0769231	2.7.1.1;2.7.1.2
path:map00983	21	6	0.285714	1.1.1.205;2.4.2.10;2.7.1.48;3.5.4.5;3.6.1.19;6.3.5.2
path:map00450	20	7	0.35	1.8.1.9;2.1.1.14;2.5.1.48;2.7.7.4;4.4.1.1;4.4.1.8;6.1.1.10
path:map00625	22	2	0.0909091	1.1.1.1;1.2.1.3
path:map00623	30	1	0.0333333	1.3.1.32
path:map00620	68	21	0.308824	1.1.1.37;1.1.1.38;1.1.2.4;1.2.1.3;1.2.4.1;1.8.1.4;2.3.1.12;2.3.1.9;2.3.3.13;2.3.3.14;2.3.3.9;2.7.1.40;3.1.2.1;3.1.2.6;3.6.1.7;4.1.1.49;4.2.1.2;4.4.1.5;6.2.1.1;6.4.1.1;6.4.1.2
path:map00350	68	8	0.117647	1.1.1.1;1.13.11.27;1.13.11.5;1.4.3.21;2.6.1.1;2.6.1.57;2.6.1.9;3.7.1.2
path:map00909	80	1	0.0125	2.5.1.21
path:map00908	11	1	0.0909091	2.5.1.75
path:map00903	23	2	0.0869565	1.2.1.3;4.2.1.17
path:map00900	50	12	0.24	1.1.1.34;2.1.1.100;2.3.1.9;2.3.3.10;2.5.1.1;2.5.1.10;2.5.1.29;2.5.1.58;2.5.1.91;3.4.24.84;4.1.1.33;5.3.3.2
path:map00020	25	17	0.68	1.1.1.37;1.1.1.41;1.1.1.42;1.2.4.1;1.2.4.2;1.3.5.1;1.8.1.4;2.3.1.12;2.3.1.61;2.3.3.1;2.3.3.8;4.1.1.49;4.2.1.2;4.2.1.3;6.2.1.4;6.2.1.5;6.4.1.1
path:map00511	9	4	0.444444	3.2.1.23;3.2.1.25;3.2.1.51;3.2.1.52
path:map00100	23	5	0.217391	1.14.13.70;1.14.13.72;1.3.1.70;2.1.1.41;2.5.1.21
path:map00531	16	2	0.125	3.2.1.23;3.2.1.52
path:map00730	21	5	0.238095	2.5.1.3;2.7.1.49;2.7.1.50;2.7.4.7;2.8.1.7
path:map00440	22	1	0.0454545	2.7.7.15
path:map00590	31	1	0.0322581	3.3.2.6
path:map00362	71	6	0.084507	1.14.13.12;1.3.1.32;2.3.1.16;2.3.1.9;4.1.1.46;4.2.1.17
path:map00361	30	1	0.0333333	1.3.1.32
path:map00360	71	8	0.112676	1.11.1.21;1.13.11.27;1.4.3.21;2.6.1.1;2.6.1.57;2.6.1.9;3.5.1.4;4.2.1.17
path:map00364	18	1	0.0555556	1.3.1.32
path:map00910	36	7	0.194444	1.4.1.4;1.7.1.3;1.7.1.4;3.5.1.49;4.2.1.1;4.2.1.104;6.3.1.2
path:map00982	10	2	0.2	1.1.1.1;2.5.1.18
path:map00290	14	8	0.571429	1.1.1.85;1.1.1.86;2.2.1.6;2.3.3.13;2.6.1.42;4.2.1.33;4.2.1.9;4.3.1.19
path:map00627	62	6	0.0967742	1.14.13.12;3.1.3.2;3.5.1.4;3.6.1.7;4.1.1.46;4.2.1.17
path:map00051	74	16	0.216216	1.1.1.138;1.1.1.17;1.1.1.67;2.7.1.1;2.7.1.105;2.7.1.11;2.7.1.28;2.7.7.13;3.1.3.11;3.1.3.46;3.2.1.78;4.1.2.13;5.3.1.1;5.3.1.6;5.3.1.8;5.4.2.8
path:map00053	47	4	0.0851064	1.1.1.22;1.13.99.1;1.2.1.3;1.8.5.1
path:map00052	47	13	0.276596	2.7.1.1;2.7.1.11;2.7.1.2;2.7.1.6;2.7.7.12;2.7.7.9;3.2.1.20;3.2.1.22;3.2.1.23;3.5.1.25;5.1.3.2;5.1.3.3;5.4.2.2
path:map00740	24	5	0.208333	2.5.1.78;2.5.1.9;2.7.1.26;3.5.4.25;4.1.99.12
path:map00565	27	2	0.0740741	3.1.3.4;3.1.4.4
path:map00564	66	14	0.212121	1.1.1.8;1.1.5.3;2.1.1.17;2.1.1.71;2.3.1.23;2.3.1.51;2.7.7.15;2.7.7.41;2.7.8.11;2.7.8.8;3.1.1.5;3.1.3.4;3.1.4.4;4.1.1.65
path:map00561	38	8	0.210526	1.2.1.3;2.3.1.158;2.3.1.51;2.7.1.29;2.7.1.30;3.1.1.3;3.1.3.4;3.2.1.22
path:map00563	4	1	0.25	2.4.1.198
path:map00562	48	12	0.25	1.13.99.1;1.2.1.18;2.7.1.137;2.7.1.67;2.7.1.68;2.7.8.11;3.1.3.25;3.1.3.36;3.1.3.8;3.1.4.11;5.3.1.1;5.5.1.4
path:map00270	77	27	0.350649	1.1.1.3;1.1.1.37;1.13.11.20;1.13.11.54;1.2.1.11;2.1.1.14;2.1.1.37;2.3.1.31;2.4.2.28;2.5.1.16;2.5.1.47;2.5.1.48;2.5.1.49;2.5.1.6;2.6.1.1;2.6.1.42;2.6.1.57;2.7.2.4;3.3.1.1;3.5.99.7;4.1.1.50;4.2.1.109;4.2.1.22;4.4.1.1;4.4.1.8;5.3.1.23;6.3.2.2
path:map00960	30	4	0.133333	1.4.3.21;2.6.1.1;2.6.1.57;2.6.1.9
path:map00966	15	1	0.0666667	2.6.1.42
path:map00980	12	2	0.166667	1.1.1.1;2.5.1.18
path:map00280	38	11	0.289474	1.2.1.27;1.2.1.3;1.8.1.4;2.3.1.16;2.3.1.9;2.3.3.10;2.6.1.42;2.8.3.5;3.1.2.4;4.2.1.17;6.4.1.4
path:map00281	15	2	0.133333	2.3.1.16;4.2.1.17
path:map00510	34	14	0.411765	2.4.1.131;2.4.1.132;2.4.1.141;2.4.1.142;2.4.1.256;2.4.1.257;2.4.1.258;2.4.1.265;2.4.1.267;2.4.1.83;2.4.99.18;2.7.8.15;3.2.1.113;3.6.1.43
path:map00514	14	1	0.0714286	2.4.1.109
path:map00040	67	12	0.179104	1.1.1.12;1.1.1.22;1.1.1.307;1.1.1.9;1.2.1.3;2.7.1.17;2.7.7.9;3.1.1.11;3.2.1.15;3.2.1.67;4.2.2.2;5.1.3.1
path:map00591	16	2	0.125	1.13.11.60;5.4.4.5
path:map00750	26	4	0.153846	1.4.3.5;2.6.1.52;2.7.1.35;4.2.3.1
path:map00592	17	4	0.235294	1.1.1.1;1.3.3.6;2.3.1.16;4.2.1.17
path:map00300	32	10	0.3125	1.1.1.3;1.1.1.87;1.2.1.11;1.2.1.31;1.5.1.10;1.5.1.7;2.3.3.14;2.6.1.57;2.7.2.4;4.2.1.36
path:map00260	67	21	0.313433	1.1.1.1;1.1.1.3;1.1.1.95;1.2.1.11;1.4.3.21;1.4.3.3;1.4.4.2;1.8.1.4;2.1.2.1;2.1.2.10;2.3.1.37;2.6.1.52;2.7.1.39;2.7.2.4;2.7.8.8;3.1.3.3;4.2.1.20;4.2.1.22;4.2.3.1;4.3.1.19;4.4.1.1
path:map00261	14	3	0.214286	1.2.1.11;2.7.2.4;2.7.7.4
path:map00330	85	16	0.188235	1.2.1.3;1.2.1.41;1.4.3.22;1.4.3.3;1.5.1.2;2.5.1.16;2.6.1.1;2.6.1.13;2.7.2.11;3.5.1.4;3.5.3.1;3.5.3.11;3.5.4.1;4.1.1.17;4.1.1.50;4.1.3.16
path:map00970	31	20	0.645161	6.1.1.1;6.1.1.10;6.1.1.11;6.1.1.12;6.1.1.14;6.1.1.15;6.1.1.16;6.1.1.17;6.1.1.18;6.1.1.19;6.1.1.2;6.1.1.20;6.1.1.21;6.1.1.22;6.1.1.3;6.1.1.4;6.1.1.5;6.1.1.6;6.1.1.7;6.1.1.9
path:map00332	12	2	0.166667	1.2.1.41;2.7.2.11
path:map00830	16	1	0.0625	1.1.1.1
path:map00472	10	1	0.1	1.4.3.3
path:map00073	9	1	0.111111	1.11.2.3
path:map00072	6	3	0.5	2.3.1.9;2.3.3.10;2.8.3.5
path:map00071	30	7	0.233333	1.1.1.1;1.2.1.3;1.3.3.6;2.3.1.16;2.3.1.9;4.2.1.17;6.2.1.3
path:map00760	56	9	0.160714	1.6.1.2;2.1.1.1;2.4.2.1;2.4.2.19;2.7.1.23;2.7.7.1;2.7.7.18;3.6.1.22;6.3.5.1
path:map00604	11	2	0.181818	3.2.1.23;3.2.1.52
path:map00600	31	8	0.258065	1.1.1.102;2.3.1.24;2.3.1.50;3.1.3.4;3.2.1.22;3.2.1.23;3.5.1.23;4.1.2.27
path:map00603	14	2	0.142857	3.2.1.22;3.2.1.52

## Sheet: NW305w0xFe10xFe_DE
Pathway	PathwaySize	#ECsCovered	Ratio	EC-numbers
path:map00626	22	1	0.0454545	1.1.1.1
path:map00310	56	3	0.0535714	1.2.4.2;2.1.1.43;2.3.1.9
path:map00311	14	1	0.0714286	1.4.3.3
path:map00720	54	7	0.12963	1.1.1.37;1.1.1.42;2.3.1.9;2.3.3.8;6.2.1.1;6.2.1.5;6.4.1.2
path:map00195	3	1	0.333333	3.6.3.14
path:map00253	8	1	0.125	6.4.1.2
path:map00250	50	10	0.2	1.4.1.4;2.1.3.2;2.6.1.1;2.6.1.16;2.6.1.19;4.1.1.15;4.3.2.1;4.3.2.2;6.3.4.5;6.3.5.5
path:map00410	37	4	0.108108	1.4.3.21;2.6.1.19;3.1.2.4;4.1.1.15
path:map00254	13	1	0.0769231	6.4.1.2
path:map00860	83	2	0.0240964	2.1.1.107;4.2.1.24
path:map00190	11	1	0.0909091	3.6.3.14
path:map00780	20	6	0.3	1.1.1.100;2.1.1.197;2.3.1.41;2.8.1.6;4.2.1.59;6.3.4.15
path:map00380	71	7	0.0985915	1.11.1.21;1.11.1.6;1.2.4.2;1.4.3.22;2.3.1.9;3.5.1.4;3.7.1.3
path:map00061	18	9	0.5	1.1.1.100;1.3.1.9;2.3.1.39;2.3.1.41;2.3.1.86;3.1.2.14;4.2.1.59;6.2.1.3;6.4.1.2
path:map00062	13	1	0.0769231	1.3.1.38
path:map00770	31	5	0.16129	2.2.1.6;2.6.1.42;2.7.1.33;2.7.8.7;4.2.1.9
path:map00513	25	5	0.2	2.4.1.131;2.4.1.132;2.4.1.257;2.4.99.18;3.2.1.113
path:map00460	27	2	0.0740741	3.2.1.21;3.5.1.49
path:map00670	24	1	0.0416667	2.1.1.45
path:map00680	87	6	0.0689655	1.1.1.37;1.2.1.2;2.6.1.52;2.7.1.29;3.1.3.11;6.2.1.1
path:map00240	65	8	0.123077	1.17.4.1;1.8.1.9;2.1.1.45;2.1.3.2;2.4.2.10;2.7.7.6;2.7.7.7;6.3.5.5
path:map00480	42	5	0.119048	1.1.1.42;1.1.1.44;1.17.4.1;1.8.5.1;2.5.1.18
path:map00710	25	5	0.2	1.1.1.37;2.2.1.1;2.6.1.1;3.1.3.11;4.1.1.49
path:map00950	56	3	0.0535714	1.4.3.21;2.6.1.1;2.6.1.57
path:map00400	43	12	0.27907	1.1.1.25;1.3.1.13;2.4.2.18;2.5.1.19;2.5.1.54;2.6.1.1;2.6.1.57;2.7.1.71;4.2.1.10;4.2.1.20;4.2.3.4;4.2.3.5
path:map00401	12	2	0.166667	2.6.1.1;2.6.1.57
path:map00500	76	17	0.223684	2.4.1.15;2.4.1.18;2.7.7.9;3.1.1.11;3.1.3.12;3.2.1.1;3.2.1.15;3.2.1.20;3.2.1.21;3.2.1.28;3.2.1.3;3.2.1.39;3.2.1.4;3.2.1.58;3.2.1.67;3.2.1.91;5.4.2.2
path:map00940	35	2	0.0571429	1.11.1.21;3.2.1.21
path:map00790	26	1	0.0384615	6.3.2.17
path:map00010	49	9	0.183673	1.1.1.1;1.2.4.1;1.8.1.4;2.7.1.40;3.1.3.11;4.1.1.49;5.1.3.3;5.4.2.2;6.2.1.1
path:map00660	22	3	0.136364	1.1.1.85;2.2.1.6;6.2.1.5
path:map00230	112	12	0.107143	1.1.1.205;1.17.1.4;1.17.4.1;2.7.1.25;2.7.1.40;2.7.4.3;2.7.6.1;2.7.7.4;2.7.7.6;2.7.7.7;4.3.2.2;5.4.2.2
path:map00430	20	2	0.1	1.13.11.20;4.1.1.15
path:map01040	15	2	0.133333	1.1.1.100;1.3.1.38
path:map00920	45	4	0.0888889	2.5.1.48;2.7.1.25;2.7.7.4;3.1.3.7
path:map00650	58	6	0.103448	2.2.1.6;2.3.1.9;2.3.3.10;2.6.1.19;2.8.3.5;4.1.1.15
path:map00220	32	9	0.28125	1.2.1.38;1.4.1.4;2.3.1.1;2.3.1.35;2.6.1.1;2.7.2.8;3.5.3.1;4.3.2.1;6.3.4.5
path:map00630	73	9	0.123288	1.1.1.37;1.11.1.6;1.2.1.2;2.3.1.9;2.3.3.1;2.3.3.9;3.5.1.49;4.1.3.1;4.1.3.16
path:map00340	42	6	0.142857	1.1.1.23;1.4.3.22;3.1.3.15;3.5.4.19;3.6.1.31;4.2.1.19
path:map01051	8	1	0.125	2.2.1.1
path:map00030	54	7	0.12963	1.1.1.44;1.1.3.4;2.2.1.1;2.7.6.1;3.1.3.11;4.1.2.4;5.4.2.2
path:map00640	56	9	0.160714	1.8.1.4;2.3.1.9;2.3.3.5;2.6.1.19;3.1.2.4;6.2.1.1;6.2.1.4;6.2.1.5;6.4.1.2
path:map00643	20	3	0.15	1.13.11.5;3.5.1.4;3.7.1.2
path:map00130	43	1	0.0232558	1.13.11.27
path:map00521	18	2	0.111111	3.1.3.25;5.4.2.2
path:map00520	118	10	0.0847458	1.6.2.2;2.4.1.16;2.6.1.16;2.7.7.12;2.7.7.13;2.7.7.9;3.2.1.14;3.2.1.55;5.1.3.2;5.4.2.2
path:map00983	21	2	0.0952381	1.1.1.205;2.4.2.10
path:map00450	20	4	0.2	1.8.1.9;2.5.1.48;2.7.7.4;6.1.1.10
path:map00625	22	1	0.0454545	1.1.1.1
path:map00620	68	12	0.176471	1.1.1.37;1.1.2.4;1.2.4.1;1.8.1.4;2.3.1.9;2.3.3.13;2.3.3.9;2.7.1.40;3.1.2.1;4.1.1.49;6.2.1.1;6.4.1.2
path:map00350	68	7	0.102941	1.1.1.1;1.13.11.27;1.13.11.5;1.4.3.21;2.6.1.1;2.6.1.57;3.7.1.2
path:map00900	50	7	0.14	1.1.1.34;2.3.1.9;2.3.3.10;2.5.1.1;2.5.1.10;2.5.1.29;4.1.1.33
path:map00020	25	10	0.4	1.1.1.37;1.1.1.42;1.2.4.1;1.2.4.2;1.8.1.4;2.3.3.1;2.3.3.8;4.1.1.49;6.2.1.4;6.2.1.5
path:map00100	23	3	0.130435	1.14.13.70;1.3.1.70;2.1.1.41
path:map00730	21	1	0.047619	2.8.1.7
path:map00362	71	1	0.0140845	2.3.1.9
path:map00360	71	6	0.084507	1.11.1.21;1.13.11.27;1.4.3.21;2.6.1.1;2.6.1.57;3.5.1.4
path:map00910	36	5	0.138889	1.4.1.4;1.7.1.3;1.7.1.4;3.5.1.49;4.2.1.1
path:map00982	10	2	0.2	1.1.1.1;2.5.1.18
path:map00290	14	6	0.428571	1.1.1.85;2.2.1.6;2.3.3.13;2.6.1.42;4.2.1.33;4.2.1.9
path:map00627	62	2	0.0322581	3.1.3.2;3.5.1.4
path:map00051	74	6	0.0810811	1.1.1.138;1.1.1.17;2.7.1.105;2.7.1.28;2.7.7.13;3.1.3.11
path:map00053	47	2	0.0425532	1.13.99.1;1.8.5.1
path:map00052	47	7	0.148936	2.7.7.12;2.7.7.9;3.2.1.20;3.2.1.22;5.1.3.2;5.1.3.3;5.4.2.2
path:map00564	66	5	0.0757576	1.1.1.8;2.1.1.17;2.3.1.23;3.1.1.5;4.1.1.65
path:map00561	38	2	0.0526316	2.7.1.29;3.2.1.22
path:map00562	48	5	0.104167	1.13.99.1;2.7.1.68;3.1.3.25;3.1.3.8;3.1.4.11
path:map00270	77	10	0.12987	1.1.1.37;1.13.11.20;2.1.1.37;2.5.1.48;2.5.1.6;2.6.1.1;2.6.1.42;2.6.1.57;3.3.1.1;5.3.1.23
path:map00960	30	3	0.1	1.4.3.21;2.6.1.1;2.6.1.57
path:map00966	15	1	0.0666667	2.6.1.42
path:map00980	12	2	0.166667	1.1.1.1;2.5.1.18
path:map00280	38	7	0.184211	1.8.1.4;2.3.1.9;2.3.3.10;2.6.1.42;2.8.3.5;3.1.2.4;6.4.1.4
path:map00510	34	5	0.147059	2.4.1.131;2.4.1.132;2.4.1.257;2.4.99.18;3.2.1.113
path:map00040	67	5	0.0746269	2.7.7.9;3.1.1.11;3.2.1.15;3.2.1.67;4.2.2.2
path:map00750	26	2	0.0769231	2.6.1.52;2.7.1.35
path:map00592	17	1	0.0588235	1.1.1.1
path:map00300	32	2	0.0625	2.6.1.57;4.2.1.36
path:map00260	67	6	0.0895522	1.1.1.1;1.4.3.21;1.4.3.3;1.8.1.4;2.6.1.52;4.2.1.20
path:map00261	14	1	0.0714286	2.7.7.4
path:map00330	85	8	0.0941176	1.4.3.22;1.4.3.3;1.5.1.2;2.6.1.1;2.6.1.13;3.5.1.4;3.5.3.1;4.1.3.16
path:map00970	31	9	0.290323	6.1.1.1;6.1.1.10;6.1.1.11;6.1.1.12;6.1.1.4;6.1.1.5;6.1.1.6;6.1.1.7;6.1.1.9
path:map00830	16	1	0.0625	1.1.1.1
path:map00472	10	1	0.1	1.4.3.3
path:map00072	6	3	0.5	2.3.1.9;2.3.3.10;2.8.3.5
path:map00071	30	3	0.1	1.1.1.1;2.3.1.9;6.2.1.3
path:map00760	56	2	0.0357143	2.4.2.19;2.7.1.23
path:map00600	31	2	0.0645161	3.2.1.22;3.5.1.23
path:map00603	14	1	0.0714286	3.2.1.22

## Sheet: NW305w0xFeNW186w0xFe_HTout
Pathway name (reference pathway)	Pathway (KEGG map)	# EC in reference pathway	# EC expressed (m)	# EC differentially expressed (x)	p-value		N	464	total # EC identified in all pathways (see tab "NW305w0xFeNW186w0xFe_all")
Energy metabolism							k	83	total # EC differentially expressed over all pathways (see tab "NW305w0xFeNW186w0xFe_aDE")
Oxidative phosphorylation	path:map00190	11	8	0	1
Nitrogen metabolism	path:map00910	36	7	1	0.750815
Methane metabolism	path:map00680	87	15	2	0.782787
Sulfur metabolism	path:map00920	45	7	3	0.112155
Carbohydrate metabolism
Citrate cycle (TCA cycle)	path:map00020	25	17	2	0.840196
Glycolysis / Gluconeogenesis	path:map00010	49	21	5	0.316022
Pyruvate metabolism	path:map00620	68	21	7	0.0620262
Starch and sucrose metabolism	path:map00500	76	25	8	0.0587833
Galactose metabolism	path:map00052	47	13	4	0.188125
Inositol phosphate metabolism	path:map00562	48	12	3	0.366059
Pentose phosphate pathway	path:map00030	54	15	1	0.950548
Propanoate metabolism	path:map00640	56	13	2	0.708388
Fructose and mannose metabolism	path:map00051	74	16	2	0.813424
Glyoxylate and dicarboxylate metabolism	path:map00630	73	13	3	0.41944
Amino sugar and nucleotide sugar metabolism	path:map00520	118	23	5	0.394773
Pentose and glucuronate interconversions	path:map00040	67	11	1	0.888552
Butanoate metabolism	path:map00650	58	9	3	0.206145
C5-Branched dibasic acid metabolism	path:map00660	22	3	0	1
Ascorbate and aldarate metabolism	path:map00053	47	4	0	1
Metabolism of cofactors and vitamins
Lipoic acid metabolism	path:map00785	3	2	0	0
One carbon pool by folate	path:map00670	24	13	0	0.708388
Pantothenate and CoA biosynthesis	path:map00770	31	11	4	0.888552
Biotin metabolism	path:map00780	20	7	2	1
Folate biosynthesis	path:map00790	26	7	1	0.750815
Thiamine metabolism	path:map00730	21	5	0	1
Riboflavin metabolism	path:map00740	24	5	1	1
Nicotinate and nicotinamide metabolism	path:map00760	56	9	0	0.206145
Vitamin B6 metabolism	path:map00750	26	4	0	0.546687
Porphyrin and chlorophyll metabolism	path:map00860	83	13	3	0.925687
Ubiquinone and other terpenoid-quinone biosynthesis	path:map00130	43	3	1	1
Retinol metabolism	path:map00830	16	1	1	0.178879
Translation
Aminoacyl-tRNA biosynthesis	path:map00970	31	20	1	0.982293
Amino acid metabolism
Valine, leucine and isoleucine biosynthesis	path:map00290	14	8	3	0.156925
Phenylalanine, tyrosine and tryptophan biosynthesis	path:map00400	43	18	2	0.863487
Arginine biosynthesis	path:map00220	32	13	2	0.708388
Cysteine and methionine metabolism	path:map00270	77	27	5	0.547993
Alanine, aspartate and glutamate metabolism	path:map00250	50	16	4	0.316559
Lysine biosynthesis	path:map00300	32	10	0	1
Valine, leucine and isoleucine degradation	path:map00280	38	11	3	0.312009
Histidine metabolism	path:map00340	42	10	0	1
Arginine and proline metabolism	path:map00330	85	16	5	0.139164
Lysine degradation	path:map00310	56	9	0	1
Tryptophan metabolism	path:map00380	71	11	3	0.312009
Tyrosine metabolism	path:map00350	68	8	3	0.156925
Phenylalanine metabolism	path:map00360	71	8	3	0.156925
Lipid metabolism
Biosynthesis of unsaturated fatty acids	path:map01040	15	8	3	0.156925
Fatty acid biosynthesis	path:map00061	18	9	3	0.206145
Synthesis and degradation of ketone bodies	path:map00072	6	3	2	0.0839329
Fatty acid elongation	path:map00062	13	5	1	0.628481
Glycine, serine and threonine metabolism	path:map00260	67	21	3	0.75863
Sphingolipid metabolism	path:map00600	31	8	3	0.156925
alpha-Linolenic acid metabolism	path:map00592	17	4	1	0.546687
Fatty acid degradation	path:map00071	30	7	1	0.750815
Steroid biosynthesis	path:map00100	23	5	4	0.00415728
Glycerophospholipid metabolism	path:map00564	66	14	0	1
Glycerolipid metabolism	path:map00561	38	8	2	0.434017
Linoleic acid metabolism	path:map00591	16	2	0	1
Ether lipid metabolism	path:map00565	27	2	0	1
Arachidonic acid metabolism	path:map00590	31	1	0	1
Glycan biosynthesis and metabolism
Other glycan degradation	path:map00511	9	4	1	0.546687
N-Glycan biosynthesis	path:map00510	34	14	1	0.939364
Various types of N-glycan biosynthesis	path:map00513	25	9	1	0.83319
Glycosylphosphatidylinositol(GPI)-anchor biosynthesis	path:map00563	4	1	0	1
Glycosaminoglycan degradation	path:map00531	16	2	1	0.326078
Other types of O-glycan biosynthesis	path:map00514	14	1	0	1
Glycosphingolipid biosynthesis - ganglio series	path:map00604	11	2	1	0.326078
Glycosphingolipid biosynthesis - globo series	path:map00603	14	2	1	0.326078
Metabolism of other amino acids
Selenocompound metabolism	path:map00450	20	7	1	0.750815
Glutathione metabolism	path:map00480	42	14	2	0.747897
beta-Alanine metabolism	path:map00410	37	9	1	0.83319
Cyanoamino acid metabolism	path:map00460	27	6	1	0.695662
Taurine and hypotaurine metabolism	path:map00430	20	3	1	0.447151
D-Arginine and D-ornithine metabolism	path:map00472	10	1	0	1
Phosphonate and phosphinate metabolism	path:map00440	22	1	0	1
Nucleotide metabolism
Pyrimidine metabolism	path:map00240	65	22	4	0.576289
Purine metabolism	path:map00230	112	36	5	0.807482
Xenobiotics biodegradation and metabolism
Drug metabolism - other enzymes	path:map00983	21	6	2	0.292576
Drug metabolism - cytochrome P450	path:map00982	10	2	2	0.0316806
Metabolism of xenobiotics by cytochrome P450	path:map00980	12	2	2	0.0316806
Styrene degradation	path:map00643	20	3	1	0.447151
Ethylbenzene degradation	path:map00642	10	1	0	1
Chloroalkane and chloroalkene degradation	path:map00625	22	2	1	0.326078
Atrazine degradation	path:map00791	12	1	0	1
Aminobenzoate degradation	path:map00627	62	6	2	0.292576
Benzoate degradation	path:map00362	71	6	0	1
Fluorobenzoate degradation	path:map00364	18	1	0	1
Caprolactam degradation	path:map00930	21	1	0	1
Naphthalene degradation	path:map00626	22	1	1	0.178879
Chlorocyclohexane and chlorobenzene degradation	path:map00361	30	1	0	1
Toluene degradation	path:map00623	30	1	0	1
Biosynthesis of other secondary metabolites
Streptomycin biosynthesis	path:map00521	18	5	1	0.628481
Novobiocin biosynthesis	path:map00401	12	3	1	0.447151
Monobactam biosynthesis	path:map00261	14	3	0	1
Carbapenem biosynthesis	path:map00332	12	2	0	1
Tropane, piperidine and pyridine alkaloid biosynthesis	path:map00960	30	4	1	0.546687
Aflatoxin biosynthesis	path:map00254	13	1	0	1
Butirosin and neomycin biosynthesis	path:map00524	26	2	0	1
Caffeine metabolism	path:map00232	14	1	1	0.178879
Penicillin and cephalosporin biosynthesis	path:map00311	14	1	0	1
Glucosinolate biosynthesis	path:map00966	15	1	1	0.178879
Phenylpropanoid biosynthesis	path:map00940	35	2	1	0.326078
Isoquinoline alkaloid biosynthesis	path:map00950	56	3	1	0.447151
Metabolism of terpenoids and polyketides
Terpenoid backbone biosynthesis	path:map00900	50	12	2	0.663935
Geraniol degradation	path:map00281	15	2	0	1
Tetracycline biosynthesis	path:map00253	8	1	0	1
Biosynthesis of ansamycins	path:map01051	8	1	0	1
Zeatin biosynthesis	path:map00908	11	1	0	1
Limonene and pinene degradation	path:map00903	23	2	0	1
Sesquiterpenoid and triterpenoid biosynthesis	path:map00909	80	1	1	0.178879

## Sheet: NW305w0xFeNW186w0xFe_all
Pathway	PathwaySize	#ECsCovered	Ratio	EC-numbers
path:map00626	22	1	0.0454545	1.1.1.1
path:map00310	56	9	0.160714	1.2.1.3;1.2.1.31;1.2.4.2;1.5.1.10;1.5.1.7;2.1.1.43;2.3.1.61;2.3.1.9;4.2.1.17
path:map00311	14	1	0.0714286	1.4.3.3
path:map00720	54	16	0.296296	1.1.1.37;1.1.1.42;1.3.5.1;1.5.1.20;1.5.1.5;2.3.1.9;2.3.3.8;3.5.4.9;4.2.1.17;4.2.1.2;4.2.1.3;6.2.1.1;6.2.1.5;6.3.4.3;6.4.1.1;6.4.1.2
path:map00195	3	1	0.333333	3.6.3.14
path:map00253	8	1	0.125	6.4.1.2
path:map00250	50	16	0.32	1.4.1.4;2.1.3.2;2.4.2.14;2.6.1.1;2.6.1.16;2.6.1.19;2.6.1.2;3.5.1.1;4.1.1.15;4.3.2.1;4.3.2.2;6.3.1.2;6.3.4.4;6.3.4.5;6.3.5.4;6.3.5.5
path:map00410	37	9	0.243243	1.2.1.18;1.2.1.3;1.4.3.21;2.5.1.16;2.6.1.19;3.1.2.4;4.1.1.15;4.2.1.17;6.3.2.1
path:map00254	13	1	0.0769231	6.4.1.2
path:map00860	83	13	0.156627	1.16.3.1;1.3.1.76;1.3.3.3;2.1.1.107;2.3.1.37;2.5.1.61;4.1.1.37;4.2.1.24;4.4.1.17;4.99.1.1;4.99.1.4;5.4.3.8;6.1.1.17
path:map00785	3	2	0.666667	2.3.1.181;2.8.1.8
path:map00190	11	8	0.727273	1.10.2.2;1.3.5.1;1.6.5.3;1.6.99.3;1.9.3.1;3.6.1.1;3.6.3.14;3.6.3.6
path:map00780	20	7	0.35	1.1.1.100;2.1.1.197;2.3.1.41;2.8.1.6;4.2.1.59;6.3.3.3;6.3.4.15
path:map00380	71	11	0.15493	1.11.1.21;1.11.1.6;1.13.11.6;1.14.13.9;1.2.1.3;1.2.4.2;1.4.3.22;2.3.1.9;3.5.1.4;3.7.1.3;4.2.1.17
path:map00061	18	9	0.5	1.1.1.100;1.3.1.9;2.3.1.39;2.3.1.41;2.3.1.86;3.1.2.14;4.2.1.59;6.2.1.3;6.4.1.2
path:map00062	13	5	0.384615	1.1.1.330;1.3.1.38;2.3.1.16;2.3.1.199;4.2.1.17
path:map00770	31	11	0.354839	1.1.1.169;1.1.1.86;2.1.2.11;2.2.1.6;2.6.1.42;2.7.1.24;2.7.1.33;2.7.8.7;4.2.1.9;6.3.2.1;6.3.2.5
path:map00513	25	9	0.36	2.4.1.131;2.4.1.132;2.4.1.141;2.4.1.142;2.4.1.257;2.4.1.258;2.4.99.18;3.2.1.113;3.2.1.52
path:map00460	27	6	0.222222	2.1.2.1;2.3.2.2;3.2.1.21;3.5.1.1;3.5.1.49;4.2.1.66
path:map00670	24	13	0.541667	1.5.1.15;1.5.1.20;1.5.1.3;1.5.1.5;2.1.1.45;2.1.2.1;2.1.2.10;2.1.2.2;2.1.2.3;3.5.1.10;3.5.4.9;6.3.3.2;6.3.4.3
path:map00680	87	15	0.172414	1.1.1.284;1.1.1.37;1.1.1.95;1.2.1.2;2.1.2.1;2.6.1.52;2.7.1.11;2.7.1.29;3.1.2.12;3.1.3.11;3.1.3.3;4.1.2.13;4.2.1.11;4.4.1.22;6.2.1.1
path:map00240	65	22	0.338462	1.17.4.1;1.3.5.2;1.8.1.9;2.1.1.45;2.1.3.2;2.4.2.1;2.4.2.10;2.4.2.9;2.7.1.48;2.7.4.6;2.7.4.9;2.7.7.6;2.7.7.7;3.5.2.3;3.5.4.1;3.5.4.12;3.5.4.5;3.6.1.19;3.6.1.23;4.1.1.23;6.3.4.2;6.3.5.5
path:map00480	42	14	0.333333	1.1.1.42;1.1.1.44;1.1.1.49;1.11.1.15;1.17.4.1;1.8.1.7;1.8.5.1;2.3.2.2;2.5.1.16;2.5.1.18;3.4.19.13;3.5.2.9;4.1.1.17;6.3.2.2
path:map00710	25	12	0.48	1.1.1.37;1.2.1.12;2.2.1.1;2.6.1.1;2.6.1.2;2.7.2.3;3.1.3.11;4.1.1.49;4.1.2.13;5.1.3.1;5.3.1.1;5.3.1.6
path:map00950	56	3	0.0535714	1.4.3.21;2.6.1.1;2.6.1.57
path:map00400	43	18	0.418605	1.1.1.24;1.1.1.25;1.3.1.13;2.4.2.18;2.5.1.19;2.5.1.54;2.6.1.1;2.6.1.57;2.6.1.9;2.7.1.71;4.1.1.48;4.1.3.27;4.2.1.10;4.2.1.20;4.2.3.4;4.2.3.5;5.3.1.24;5.4.99.5
path:map00401	12	3	0.25	2.6.1.1;2.6.1.57;2.6.1.9
path:map00500	76	25	0.328947	1.1.1.22;2.4.1.1;2.4.1.11;2.4.1.15;2.4.1.18;2.4.1.34;2.7.1.1;2.7.1.2;2.7.7.9;3.1.1.11;3.1.3.12;3.2.1.1;3.2.1.15;3.2.1.20;3.2.1.21;3.2.1.28;3.2.1.3;3.2.1.37;3.2.1.39;3.2.1.4;3.2.1.58;3.2.1.67;3.2.1.91;5.3.1.9;5.4.2.2
path:map00940	35	2	0.0571429	1.11.1.21;3.2.1.21
path:map00790	26	7	0.269231	1.5.1.3;2.5.1.15;2.7.6.3;2.8.1.12;3.5.4.16;4.1.99.18;6.3.2.17
path:map00791	12	1	0.0833333	3.5.1.5
path:map00010	49	21	0.428571	1.1.1.1;1.2.1.12;1.2.1.3;1.2.4.1;1.8.1.4;2.3.1.12;2.7.1.1;2.7.1.11;2.7.1.2;2.7.1.40;2.7.2.3;3.1.3.11;4.1.1.1;4.1.1.49;4.1.2.13;4.2.1.11;5.1.3.3;5.3.1.1;5.3.1.9;5.4.2.2;6.2.1.1
path:map00660	22	3	0.136364	1.1.1.85;2.2.1.6;6.2.1.5
path:map00230	112	36	0.321429	1.1.1.205;1.17.1.4;1.17.4.1;1.7.3.3;2.1.2.2;2.1.2.3;2.4.2.1;2.4.2.14;2.4.2.7;2.7.1.20;2.7.1.25;2.7.1.40;2.7.4.3;2.7.4.6;2.7.4.8;2.7.6.1;2.7.7.4;2.7.7.6;2.7.7.7;3.5.1.5;3.5.2.17;3.5.2.5;3.5.3.4;3.5.4.10;3.5.4.2;3.5.4.6;3.6.1.19;4.3.2.2;4.6.1.1;5.4.2.2;6.3.2.6;6.3.3.1;6.3.4.13;6.3.4.4;6.3.5.2;6.3.5.3
path:map00232	14	1	0.0714286	1.7.3.3
path:map00430	20	3	0.15	1.13.11.20;2.3.2.2;4.1.1.15
path:map01040	15	8	0.533333	1.1.1.100;1.1.1.330;1.14.19.1;1.3.1.38;1.3.3.6;2.3.1.16;2.3.1.199;4.2.1.17
path:map00920	45	7	0.155556	1.8.1.2;1.8.4.8;2.5.1.47;2.5.1.48;2.7.1.25;2.7.7.4;3.1.3.7
path:map00650	58	9	0.155172	1.1.1.83;1.3.5.1;2.2.1.6;2.3.1.9;2.3.3.10;2.6.1.19;2.8.3.5;4.1.1.15;4.2.1.17
path:map00220	32	13	0.40625	1.2.1.38;1.4.1.4;2.3.1.1;2.3.1.35;2.6.1.1;2.6.1.11;2.6.1.2;2.7.2.8;3.5.1.5;3.5.3.1;4.3.2.1;6.3.1.2;6.3.4.5
path:map00630	73	13	0.178082	1.1.1.37;1.11.1.6;1.2.1.2;2.1.2.1;2.3.1.9;2.3.3.1;2.3.3.9;3.5.1.10;3.5.1.49;4.1.3.1;4.1.3.16;4.2.1.3;6.3.1.2
path:map00340	42	10	0.238095	1.1.1.23;1.2.1.3;1.4.3.22;2.4.2.17;2.6.1.9;3.1.3.15;3.5.4.19;3.6.1.31;4.2.1.19;5.3.1.16
path:map01051	8	1	0.125	2.2.1.1
path:map00930	21	1	0.047619	4.2.1.17
path:map00030	54	15	0.277778	1.1.1.44;1.1.1.49;1.1.3.4;2.2.1.1;2.2.1.2;2.7.1.11;2.7.6.1;3.1.1.31;3.1.3.11;4.1.2.13;4.1.2.4;5.1.3.1;5.3.1.6;5.3.1.9;5.4.2.2
path:map00640	56	13	0.232143	1.2.1.18;1.2.1.27;1.8.1.4;2.3.1.9;2.3.3.5;2.6.1.19;3.1.2.4;4.2.1.17;4.2.1.79;6.2.1.1;6.2.1.4;6.2.1.5;6.4.1.2
path:map00642	10	1	0.1	2.3.1.16
path:map00643	20	3	0.15	1.13.11.5;3.5.1.4;3.7.1.2
path:map00130	43	3	0.0697674	1.13.11.27;2.1.1.163;2.1.1.201
path:map00521	18	5	0.277778	2.7.1.1;2.7.1.2;3.1.3.25;5.4.2.2;5.5.1.4
path:map00520	118	23	0.194915	1.1.1.22;1.6.2.2;2.3.1.4;2.4.1.16;2.6.1.16;2.7.1.1;2.7.1.2;2.7.1.6;2.7.7.12;2.7.7.13;2.7.7.23;2.7.7.9;3.2.1.14;3.2.1.37;3.2.1.52;3.2.1.55;3.5.1.25;3.5.99.6;5.1.3.2;5.3.1.8;5.3.1.9;5.4.2.2;5.4.2.8
path:map00524	26	2	0.0769231	2.7.1.1;2.7.1.2
path:map00983	21	6	0.285714	1.1.1.205;2.4.2.10;2.7.1.48;3.5.4.5;3.6.1.19;6.3.5.2
path:map00450	20	7	0.35	1.8.1.9;2.1.1.14;2.5.1.48;2.7.7.4;4.4.1.1;4.4.1.8;6.1.1.10
path:map00625	22	2	0.0909091	1.1.1.1;1.2.1.3
path:map00623	30	1	0.0333333	1.3.1.32
path:map00620	68	21	0.308824	1.1.1.37;1.1.1.38;1.1.2.4;1.2.1.3;1.2.4.1;1.8.1.4;2.3.1.12;2.3.1.9;2.3.3.13;2.3.3.14;2.3.3.9;2.7.1.40;3.1.2.1;3.1.2.6;3.6.1.7;4.1.1.49;4.2.1.2;4.4.1.5;6.2.1.1;6.4.1.1;6.4.1.2
path:map00350	68	8	0.117647	1.1.1.1;1.13.11.27;1.13.11.5;1.4.3.21;2.6.1.1;2.6.1.57;2.6.1.9;3.7.1.2
path:map00909	80	1	0.0125	2.5.1.21
path:map00908	11	1	0.0909091	2.5.1.75
path:map00903	23	2	0.0869565	1.2.1.3;4.2.1.17
path:map00900	50	12	0.24	1.1.1.34;2.1.1.100;2.3.1.9;2.3.3.10;2.5.1.1;2.5.1.10;2.5.1.29;2.5.1.58;2.5.1.91;3.4.24.84;4.1.1.33;5.3.3.2
path:map00020	25	17	0.68	1.1.1.37;1.1.1.41;1.1.1.42;1.2.4.1;1.2.4.2;1.3.5.1;1.8.1.4;2.3.1.12;2.3.1.61;2.3.3.1;2.3.3.8;4.1.1.49;4.2.1.2;4.2.1.3;6.2.1.4;6.2.1.5;6.4.1.1
path:map00511	9	4	0.444444	3.2.1.23;3.2.1.25;3.2.1.51;3.2.1.52
path:map00100	23	5	0.217391	1.14.13.70;1.14.13.72;1.3.1.70;2.1.1.41;2.5.1.21
path:map00531	16	2	0.125	3.2.1.23;3.2.1.52
path:map00730	21	5	0.238095	2.5.1.3;2.7.1.49;2.7.1.50;2.7.4.7;2.8.1.7
path:map00440	22	1	0.0454545	2.7.7.15
path:map00590	31	1	0.0322581	3.3.2.6
path:map00362	71	6	0.084507	1.14.13.12;1.3.1.32;2.3.1.16;2.3.1.9;4.1.1.46;4.2.1.17
path:map00361	30	1	0.0333333	1.3.1.32
path:map00360	71	8	0.112676	1.11.1.21;1.13.11.27;1.4.3.21;2.6.1.1;2.6.1.57;2.6.1.9;3.5.1.4;4.2.1.17
path:map00364	18	1	0.0555556	1.3.1.32
path:map00910	36	7	0.194444	1.4.1.4;1.7.1.3;1.7.1.4;3.5.1.49;4.2.1.1;4.2.1.104;6.3.1.2
path:map00982	10	2	0.2	1.1.1.1;2.5.1.18
path:map00290	14	8	0.571429	1.1.1.85;1.1.1.86;2.2.1.6;2.3.3.13;2.6.1.42;4.2.1.33;4.2.1.9;4.3.1.19
path:map00627	62	6	0.0967742	1.14.13.12;3.1.3.2;3.5.1.4;3.6.1.7;4.1.1.46;4.2.1.17
path:map00051	74	16	0.216216	1.1.1.138;1.1.1.17;1.1.1.67;2.7.1.1;2.7.1.105;2.7.1.11;2.7.1.28;2.7.7.13;3.1.3.11;3.1.3.46;3.2.1.78;4.1.2.13;5.3.1.1;5.3.1.6;5.3.1.8;5.4.2.8
path:map00053	47	4	0.0851064	1.1.1.22;1.13.99.1;1.2.1.3;1.8.5.1
path:map00052	47	13	0.276596	2.7.1.1;2.7.1.11;2.7.1.2;2.7.1.6;2.7.7.12;2.7.7.9;3.2.1.20;3.2.1.22;3.2.1.23;3.5.1.25;5.1.3.2;5.1.3.3;5.4.2.2
path:map00740	24	5	0.208333	2.5.1.78;2.5.1.9;2.7.1.26;3.5.4.25;4.1.99.12
path:map00565	27	2	0.0740741	3.1.3.4;3.1.4.4
path:map00564	66	14	0.212121	1.1.1.8;1.1.5.3;2.1.1.17;2.1.1.71;2.3.1.23;2.3.1.51;2.7.7.15;2.7.7.41;2.7.8.11;2.7.8.8;3.1.1.5;3.1.3.4;3.1.4.4;4.1.1.65
path:map00561	38	8	0.210526	1.2.1.3;2.3.1.158;2.3.1.51;2.7.1.29;2.7.1.30;3.1.1.3;3.1.3.4;3.2.1.22
path:map00563	4	1	0.25	2.4.1.198
path:map00562	48	12	0.25	1.13.99.1;1.2.1.18;2.7.1.137;2.7.1.67;2.7.1.68;2.7.8.11;3.1.3.25;3.1.3.36;3.1.3.8;3.1.4.11;5.3.1.1;5.5.1.4
path:map00270	77	27	0.350649	1.1.1.3;1.1.1.37;1.13.11.20;1.13.11.54;1.2.1.11;2.1.1.14;2.3.1.31;2.4.2.28;2.5.1.16;2.5.1.47;2.5.1.48;2.5.1.49;2.5.1.6;2.6.1.1;2.6.1.42;2.6.1.57;2.7.2.4;3.3.1.1;3.5.4.31;3.5.99.7;4.1.1.50;4.2.1.109;4.2.1.22;4.4.1.1;4.4.1.8;5.3.1.23;6.3.2.2
path:map00960	30	4	0.133333	1.4.3.21;2.6.1.1;2.6.1.57;2.6.1.9
path:map00966	15	1	0.0666667	2.6.1.42
path:map00980	12	2	0.166667	1.1.1.1;2.5.1.18
path:map00280	38	11	0.289474	1.2.1.27;1.2.1.3;1.8.1.4;2.3.1.16;2.3.1.9;2.3.3.10;2.6.1.42;2.8.3.5;3.1.2.4;4.2.1.17;6.4.1.4
path:map00281	15	2	0.133333	2.3.1.16;4.2.1.17
path:map00510	34	14	0.411765	2.4.1.131;2.4.1.132;2.4.1.141;2.4.1.142;2.4.1.256;2.4.1.257;2.4.1.258;2.4.1.265;2.4.1.267;2.4.1.83;2.4.99.18;2.7.8.15;3.2.1.113;3.6.1.43
path:map00514	14	1	0.0714286	2.4.1.109
path:map00040	67	11	0.164179	1.1.1.12;1.1.1.22;1.1.1.307;1.1.1.9;1.2.1.3;2.7.1.17;2.7.7.9;3.1.1.11;3.2.1.15;3.2.1.67;5.1.3.1
path:map00591	16	2	0.125	1.13.11.60;5.4.4.5
path:map00750	26	4	0.153846	1.4.3.5;2.6.1.52;2.7.1.35;4.2.3.1
path:map00592	17	4	0.235294	1.1.1.1;1.3.3.6;2.3.1.16;4.2.1.17
path:map00300	32	10	0.3125	1.1.1.3;1.1.1.87;1.2.1.11;1.2.1.31;1.5.1.10;1.5.1.7;2.3.3.14;2.6.1.57;2.7.2.4;4.2.1.36
path:map00260	67	21	0.313433	1.1.1.1;1.1.1.3;1.1.1.95;1.2.1.11;1.4.3.21;1.4.3.3;1.4.4.2;1.8.1.4;2.1.2.1;2.1.2.10;2.3.1.37;2.6.1.52;2.7.1.39;2.7.2.4;2.7.8.8;3.1.3.3;4.2.1.20;4.2.1.22;4.2.3.1;4.3.1.19;4.4.1.1
path:map00261	14	3	0.214286	1.2.1.11;2.7.2.4;2.7.7.4
path:map00330	85	16	0.188235	1.2.1.3;1.2.1.41;1.4.3.22;1.4.3.3;1.5.1.2;2.5.1.16;2.6.1.1;2.6.1.13;2.7.2.11;3.5.1.4;3.5.3.1;3.5.3.11;3.5.4.1;4.1.1.17;4.1.1.50;4.1.3.16
path:map00970	31	20	0.645161	6.1.1.1;6.1.1.10;6.1.1.11;6.1.1.12;6.1.1.14;6.1.1.15;6.1.1.16;6.1.1.17;6.1.1.18;6.1.1.19;6.1.1.2;6.1.1.20;6.1.1.21;6.1.1.22;6.1.1.3;6.1.1.4;6.1.1.5;6.1.1.6;6.1.1.7;6.1.1.9
path:map00332	12	2	0.166667	1.2.1.41;2.7.2.11
path:map00830	16	1	0.0625	1.1.1.1
path:map00472	10	1	0.1	1.4.3.3
path:map00073	9	1	0.111111	1.11.2.3
path:map00072	6	3	0.5	2.3.1.9;2.3.3.10;2.8.3.5
path:map00071	30	7	0.233333	1.1.1.1;1.2.1.3;1.3.3.6;2.3.1.16;2.3.1.9;4.2.1.17;6.2.1.3
path:map00760	56	9	0.160714	1.6.1.2;2.1.1.1;2.4.2.1;2.4.2.19;2.7.1.23;2.7.7.1;2.7.7.18;3.6.1.22;6.3.5.1
path:map00604	11	2	0.181818	3.2.1.23;3.2.1.52
path:map00600	31	8	0.258065	1.1.1.102;2.3.1.24;2.3.1.50;3.1.3.4;3.2.1.22;3.2.1.23;3.5.1.23;4.1.2.27
path:map00603	14	2	0.142857	3.2.1.22;3.2.1.52

## Sheet: NW305w0xFeNW186w0xFe_DE
Pathway	PathwaySize	#ECsCovered	Ratio	EC-numbers
path:map00626	22	1	0.0454545	1.1.1.1
path:map00720	54	2	0.037037	1.1.1.42;6.2.1.1
path:map00250	50	4	0.08	2.4.2.14;2.6.1.1;2.6.1.19;6.3.5.5
path:map00410	37	1	0.027027	2.6.1.19
path:map00860	83	3	0.0361446	1.3.1.76;1.3.3.3;4.99.1.4
path:map00780	20	2	0.1	1.1.1.100;2.3.1.41
path:map00380	71	3	0.0422535	1.11.1.6;3.5.1.4;3.7.1.3
path:map00061	18	3	0.166667	1.1.1.100;2.3.1.41;2.3.1.86
path:map00062	13	1	0.0769231	2.3.1.199
path:map00770	31	4	0.129032	2.6.1.42;2.7.1.33;2.7.8.7;4.2.1.9
path:map00513	25	1	0.04	3.2.1.113
path:map00460	27	1	0.037037	3.2.1.21
path:map00680	87	2	0.0229885	1.2.1.2;6.2.1.1
path:map00240	65	4	0.0615385	2.4.2.10;2.7.4.9;2.7.7.6;6.3.5.5
path:map00480	42	2	0.047619	1.1.1.42;2.5.1.18
path:map00710	25	3	0.12	2.6.1.1;4.1.1.49;5.3.1.1
path:map00950	56	1	0.0178571	2.6.1.1
path:map00400	43	2	0.0465116	2.6.1.1;4.2.1.20
path:map00401	12	1	0.0833333	2.6.1.1
path:map00500	76	8	0.105263	2.4.1.11;2.4.1.15;3.1.1.11;3.2.1.1;3.2.1.21;3.2.1.3;3.2.1.4;3.2.1.91
path:map00940	35	1	0.0285714	3.2.1.21
path:map00790	26	1	0.0384615	6.3.2.17
path:map00010	49	5	0.102041	1.1.1.1;4.1.1.1;4.1.1.49;5.3.1.1;6.2.1.1
path:map00230	112	5	0.0446429	1.1.1.205;1.7.3.3;2.4.2.14;2.7.7.6;3.5.4.2
path:map00232	14	1	0.0714286	1.7.3.3
path:map00430	20	1	0.05	1.13.11.20
path:map01040	15	3	0.2	1.1.1.100;1.14.19.1;2.3.1.199
path:map00920	45	3	0.0666667	1.8.1.2;1.8.4.8;2.5.1.48
path:map00650	58	3	0.0517241	2.3.3.10;2.6.1.19;2.8.3.5
path:map00220	32	2	0.0625	2.6.1.1;3.5.3.1
path:map00630	73	3	0.0410959	1.11.1.6;1.2.1.2;2.3.3.9
path:map00030	54	1	0.0185185	1.1.3.4
path:map00640	56	2	0.0357143	2.6.1.19;6.2.1.1
path:map00643	20	1	0.05	3.5.1.4
path:map00130	43	1	0.0232558	1.13.11.27
path:map00521	18	1	0.0555556	3.1.3.25
path:map00520	118	5	0.0423729	1.6.2.2;3.2.1.14;3.5.1.25;3.5.99.6;5.1.3.2
path:map00983	21	2	0.0952381	1.1.1.205;2.4.2.10
path:map00450	20	1	0.05	2.5.1.48
path:map00625	22	1	0.0454545	1.1.1.1
path:map00620	68	7	0.102941	1.1.1.38;2.3.3.13;2.3.3.9;3.1.2.1;3.6.1.7;4.1.1.49;6.2.1.1
path:map00350	68	3	0.0441176	1.1.1.1;1.13.11.27;2.6.1.1
path:map00909	80	1	0.0125	2.5.1.21
path:map00900	50	2	0.04	2.3.3.10;2.5.1.29
path:map00020	25	2	0.08	1.1.1.42;4.1.1.49
path:map00511	9	1	0.111111	3.2.1.23
path:map00100	23	4	0.173913	1.14.13.70;1.14.13.72;1.3.1.70;2.5.1.21
path:map00531	16	1	0.0625	3.2.1.23
path:map00360	71	3	0.0422535	1.13.11.27;2.6.1.1;3.5.1.4
path:map00910	36	1	0.0277778	4.2.1.1
path:map00982	10	2	0.2	1.1.1.1;2.5.1.18
path:map00290	14	3	0.214286	2.3.3.13;2.6.1.42;4.2.1.9
path:map00627	62	2	0.0322581	3.5.1.4;3.6.1.7
path:map00051	74	2	0.027027	1.1.1.17;5.3.1.1
path:map00052	47	4	0.0851064	3.2.1.22;3.2.1.23;3.5.1.25;5.1.3.2
path:map00740	24	1	0.0416667	3.5.4.25
path:map00561	38	2	0.0526316	2.7.1.30;3.2.1.22
path:map00562	48	3	0.0625	3.1.3.25;3.1.3.8;5.3.1.1
path:map00270	77	5	0.0649351	1.13.11.20;2.5.1.48;2.6.1.1;2.6.1.42;3.5.4.31
path:map00960	30	1	0.0333333	2.6.1.1
path:map00966	15	1	0.0666667	2.6.1.42
path:map00980	12	2	0.166667	1.1.1.1;2.5.1.18
path:map00280	38	3	0.0789474	2.3.3.10;2.6.1.42;2.8.3.5
path:map00510	34	1	0.0294118	3.2.1.113
path:map00040	67	1	0.0149254	3.1.1.11
path:map00592	17	1	0.0588235	1.1.1.1
path:map00260	67	3	0.0447761	1.1.1.1;1.4.4.2;4.2.1.20
path:map00330	85	5	0.0588235	2.6.1.1;2.6.1.13;3.5.1.4;3.5.3.1;3.5.3.11
path:map00970	31	1	0.0322581	6.1.1.7
path:map00830	16	1	0.0625	1.1.1.1
path:map00073	9	1	0.111111	1.11.2.3
path:map00072	6	2	0.333333	2.3.3.10;2.8.3.5
path:map00071	30	1	0.0333333	1.1.1.1
path:map00604	11	1	0.0909091	3.2.1.23
path:map00600	31	3	0.0967742	2.3.1.50;3.2.1.22;3.2.1.23
path:map00603	14	1	0.0714286	3.2.1.22
